# Supplementary material for: JMJD2C promotes colorectal cancer metastasis via regulating histone methylation of MALAT1 promoter and enhancing β-catenin signaling pathway
Source: PubMed Central journal article supplement (PMC6819649; doi:10.1186/s13046-019-1439-x), 2019-10-29

**A**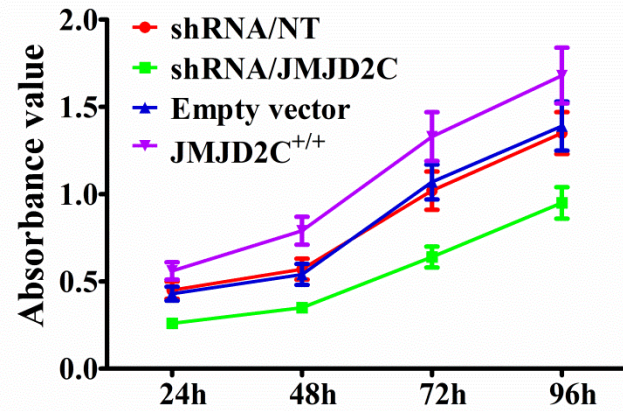**B**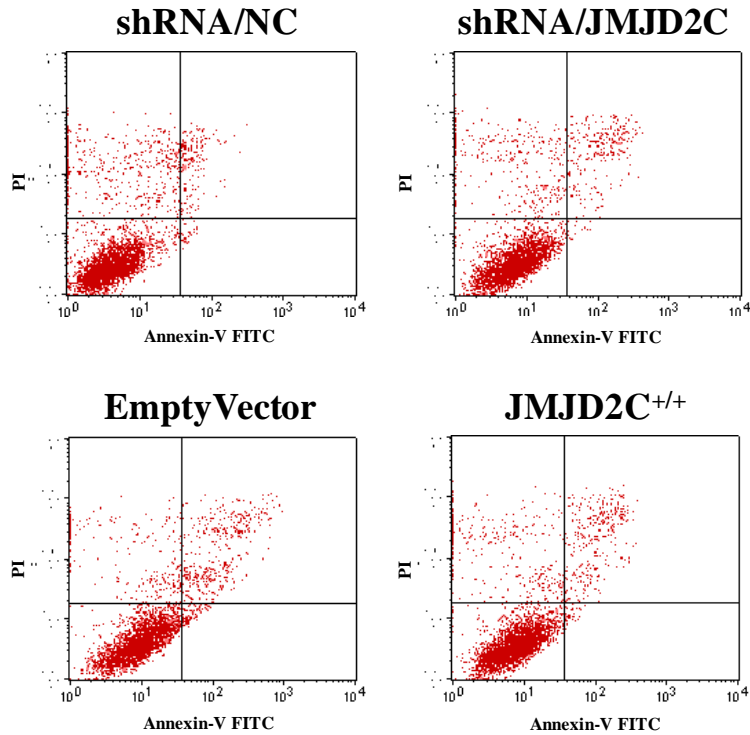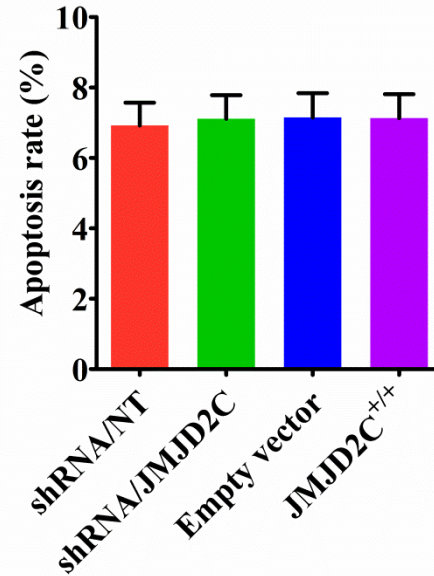

Supplement: 13046_2019_1439_MOESM2_ESM.pdf [file 13046_2019_1439_MOESM2_ESM.pdf]
